# Supplementary material for: Critical Role of Transient Activity of MT1-MMP for ECM Degradation in Invadopodia
Source: PubMed Central journal article supplement (PMC3667784; doi:10.1371/journal.pcbi.1003086), 2013-05-30
Supplement: pcbi.1003086.s014.pdf [file pcbi.1003086.s014.pdf]

Table S1 Parameters for analyzing dynamics of MT1-MMP in the temporal simulations.

| parameters | Values                | unit |
|------------|-----------------------|------|
| M14        | $1.00 \times 10^{-7}$ | M    |
| M2         | $1.00 \times 10^{-7}$ | M    |
| T2         | $1.00 \times 10^{-7}$ | M    |
| kM14       | $2.00 \times 10^6$    | /M/s |
| k_M14      | 0.01                  | /s   |
| kM2        | $2.10 \times 10^7$    | /M/s |
| kT2        | $2.74 \times 10^6$    | /M/s |
| k_T2       | $2.00 \times 10^{-4}$ | /s   |
