# Supplementary material for: Critical Role of Transient Activity of MT1-MMP for ECM Degradation in Invadopodia
Source: PubMed Central journal article supplement (PMC3667784; doi:10.1371/journal.pcbi.1003086), 2013-05-30
Supplement: pcbi.1003086.s015.pdf [file pcbi.1003086.s015.pdf]

Table S2 Parameters for analyzing dynamics of MT1-MMP with pools X and D in the temporal simulations.

| parameters | Values                 | unit |
|------------|------------------------|------|
| Cpd·CD     | $2.69 \times 10^{-9}$  | /s   |
| CX         | $1.18 \times 10^{-10}$ | M/s  |
| M14D       | $6.99 \times 10^{-8}$  | M    |
| M14x       | $3.01 \times 10^{-8}$  | M    |
| M2         | $1.00 \times 10^{-7}$  | M    |
| MF         | $3.06 \times 10^{-8}$  | M    |
| Ms         | $6.06 \times 10^{-8}$  | M    |
| T2         | $1.00 \times 10^{-7}$  | M    |
| kD         | 0.0385                 | /s   |
| kM14       | $2.00 \times 10^6$     | /M/s |
| k_M14      | 0.01                   | /s   |
| kM2        | $2.10 \times 10^7$     | /M/s |
| kT2        | $2.74 \times 10^6$     | /M/s |
| k_T2       | $2.00 \times 10^{-4}$  | /s   |
| kX         | 0.00386                | /s   |
